# Supplementary material for: A Novel off-the-Shelf Trastuzumab-Armed NK Cell Therapy (ACE1702) Using Antibody-Cell-Conjugation Technology
Source: MDPI journal article supplement (doi:10.3390/cancers13112724), 2021-05-31
Supplement: s1 [file s1]

# A Novel Off-the-Shelf Trastuzumab-Armed NK Cell Therapy (ACE1702) Using Antibody-Cell-Conjugation Technology

Hao-Kang Li \*, Ching-Wen Hsiao, Sen-Han Yang, Hsiu-Ping Yang, Tai-Sheng Wu, Chia-Yun Lee, Yan-Liang Lin, Janet Pan, Zih-Fei Cheng, Yan-Da Lai, Shih-Chia Hsiao and Sai-Wen Tang \*

## Supplementary Table:

**Table S1.** List of antibodies used in this study. \*, the anti-human pan-KIR antibody detects human cells transfected with KIR2DL2, 2DL3, 2DS2, or 2DS4, but not cells transfected with KIR2DL1, 2DL4, 3DL1, or 3DL2 as described in manufacturer's specification.

| Name                                                                                | Catalog number | Vendor                       |
|-------------------------------------------------------------------------------------|----------------|------------------------------|
| Phycoerythrin-AffiniPure Goat Anti-Human IgG, F(ab') <sub>2</sub> Fragment Specific | 109-116-097    | Jackson Immuno Research Labs |
| FITC- anti human CD56 antibody                                                      | 318304         | BioLegend                    |
| PE/Cy5 anti-human CD3 antibody                                                      | 300410         | BioLegend                    |
| PE/Cy7 anti-human CD16 antibody                                                     | 302016         | BioLegend                    |
| APC/Cy7 anti-human CD107a antibody                                                  | 328630         | BioLegend                    |
| FITC anti-human TNF $\alpha$ antibody                                               | 502906         | BioLegend                    |
| PE/Cy7 anti-human IFN $\gamma$ antibody                                             | 502528         | BioLegend                    |
| PE/Cy7 anti-human NKp30 antibody                                                    | 325214         | BioLegend                    |
| PE/Cy7 anti-human NKp44 antibody                                                    | 325116         | BioLegend                    |
| PE anti-human NKG2A antibody                                                        | FAB1059P       | R&D Systems                  |
| PE anti-human pan-KIR antibody*                                                     | FAB1848P       | R&D Systems                  |
| FITC anti-human TCRVd2 antibody                                                     | 331406         | BioLegend                    |
| PE anti-human CD8 antibody                                                          | 344706         | BioLegend                    |
| PE/Cy7 anti-human CD4 antibody                                                      | 357410         | BioLegend                    |
| APC/Cy7 anti-human TCRVd2 antibody                                                  | 331440         | BioLegend                    |

## Supplementary Figures

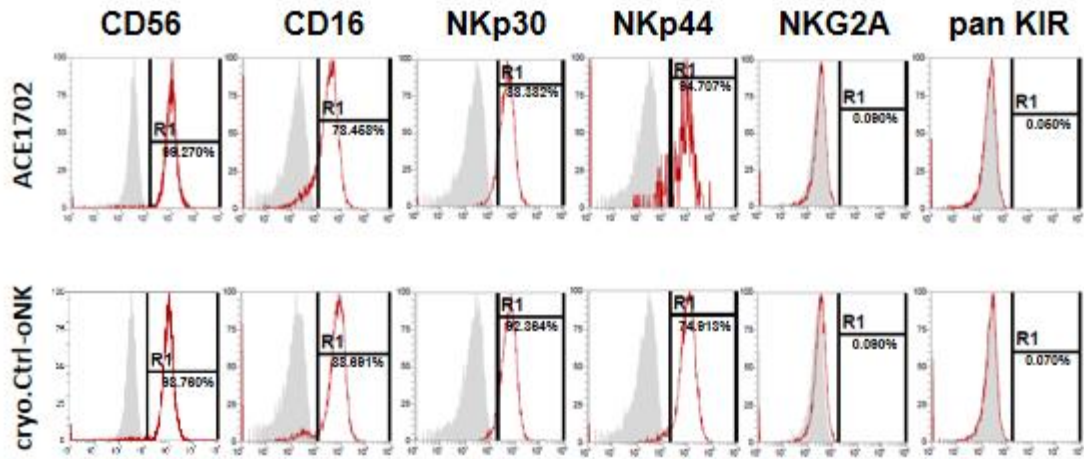

**Figure S1.** The expression of CD56, CD16, NKp30, NKp44, NKG2A and killer-cell immunoglobulin receptors (KIRs) in ACE1702 and cryo.Ctrl-oNK. FITC-anti-TCRVd2 antibody was used as negative target staining of CD56. PE/Cy7-anti-CD4 antibody was used as negative target staining of CD16, NKp30 and NKp44. PE-anti-CD8 antibody was used for negative target staining of NKG2a and pan-KIR. Shaded peaks showed corresponding staining of negative targets.

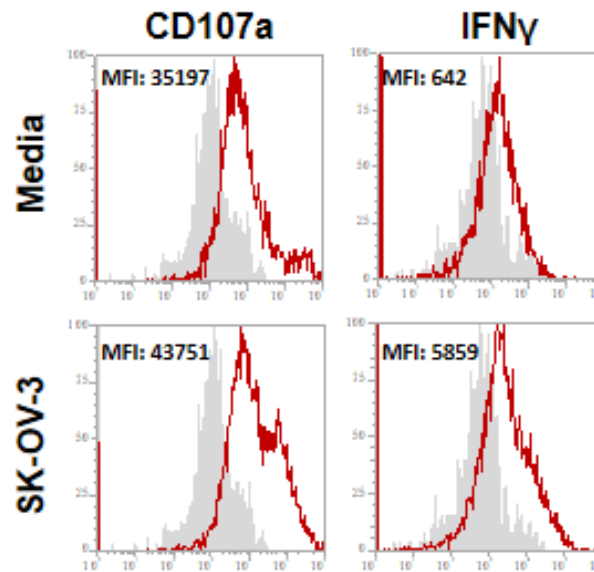

**Figure S2.** Flow cytometry analysis of CD107a and IFN $\gamma$  levels in ACE-oNK-HER2 incubated with or without SK-OV-3 cells. APC-Cy7-conjugated antibody against human TCRVd2 and PE/Cy7-conjugated against human CD4 were used for negative target staining of CD107a and IFN $\gamma$ , respectively.

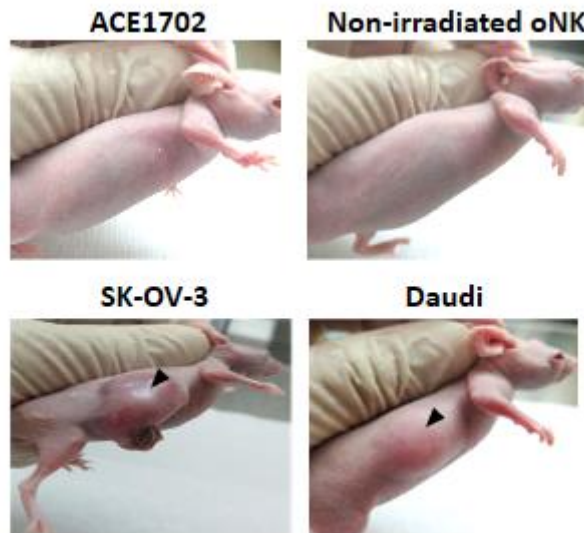

**Figure S3.** No tumorigenicity of ACE1702 and oNK cells in vivo.  $1 \times 10^7$  of ACE1702, non-irradiated oNK, SK-OV-3 and Daudi were subcutaneously implanted into female BALB/c nude mice. Five mice were included in each group and tumor size were monitored for 60 days. Representative images of mice implanted with ACE1702, non-irradiated oNK, SK-OV-3 and Daudi were shown. Tumors were indicated by black arrowheads.

(A)

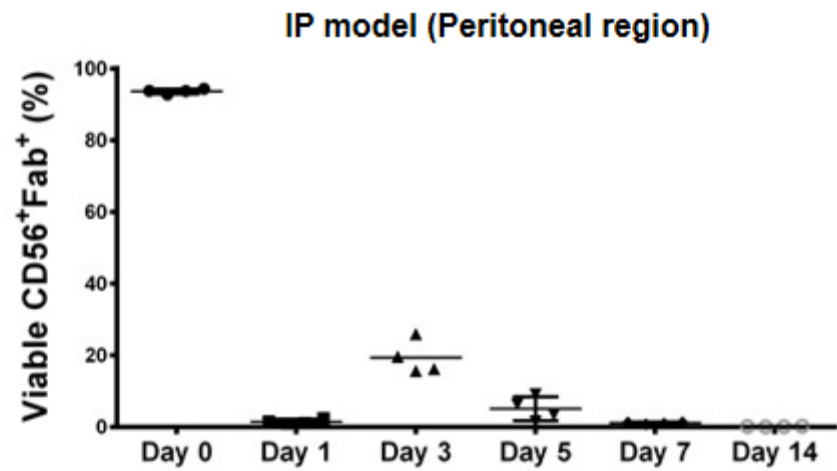

(B)

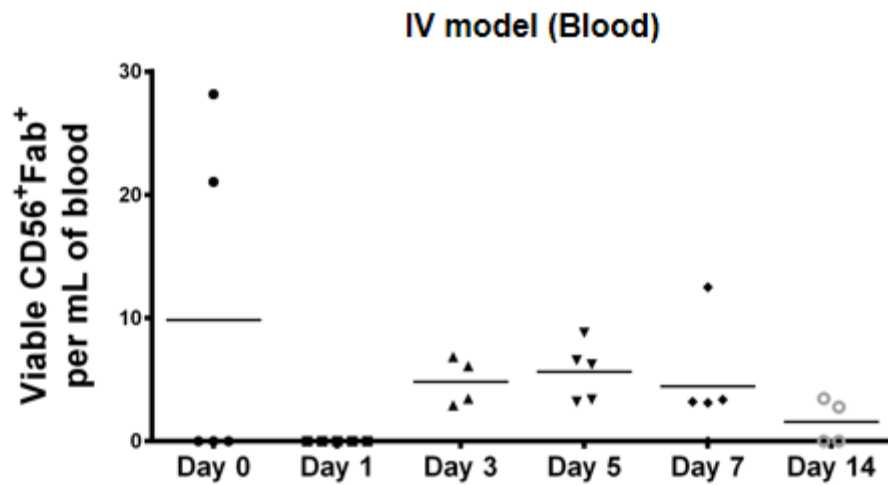

**Figure S4.** Detection of ACE1702 in the peritoneum and blood. **(A)**  $5 \times 10^6$  of ACE1702 was intraperitoneally delivered into BALB/c nude mice (4 mice per timepoint). Viable CD56<sup>+</sup>Fab<sup>+</sup> cells in peritoneal lavage were stained with anti-human CD56 antibody and anti-F(ab')<sub>2</sub> antibody and detected by flow cytometry on Day 0, 1, 3, 5, 7 and 14. **(B)**  $3 \times 10^6$  of ACE1702 was intravenously delivered into BALB/c nude mice (5 mice per timepoint). ACE1702 was stained with anti-human CD56 antibody and anti-F(ab')<sub>2</sub> antibody and detected by flow cytometry on Day 0, 1, 3, 5, 7 and 14;.

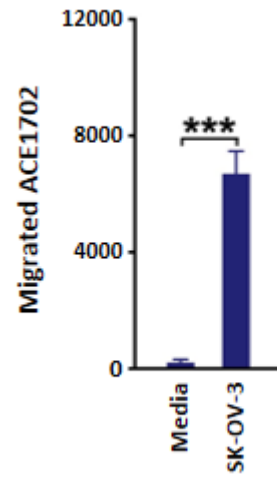

**Figure S5: Migratory capacity of ACE1702.** The migrated ACE1702 in the absence and presence of SK-OV-3 were harvested and stained with anti-CD56 antibody for flow cytometry analysis.
